# Supplementary material
Source: MDPI journal article supplement (https://www.mdpi.com/2071-1050/15/7/6009)
Supplement: s1 [file s1 › sustainability-2281396-supplementary.pdf]

**Table S1.** Soil properties in bulk soil and rhizosphere soil

| Soil | SOM/%       |                  | pH         |                  | Eh/mV         |                  | CEC/ mol·kg <sup>-1</sup> |                  |
|------|-------------|------------------|------------|------------------|---------------|------------------|---------------------------|------------------|
|      | Bulk soil   | Rhizosphere soil | Bulk soil  | Rhizosphere soil | Bulk soil     | Rhizosphere soil | Bulk soil                 | Rhizosphere soil |
| L    | 33.87±5.87a | 34.13±3.44a      | 6.99±0.14a | 6.81±0.03a       | 693.15±9.58a  | 672.00±10.11a    | 14.35±0.71b               | 16.23±0.48a      |
| M    | 36.63±5.01a | 38.10±6.26a      | 7.38±0.28a | 7.12±0.10a       | 679.28±10.52a | 642.00±11.14b    | 13.89±0.85a               | 16.01±1.02a      |
| H    | 33.67±1.66a | 34.50±2.14a      | 7.54±0.18a | 7.27±0.09a       | 661.87±7.42a  | 646.67±8.33a     | 13.78±0.59b               | 15.43±0.68a      |

Data represent average mean from three repetitions. Each value is followed by its SD. Different letters between bulk soil and rhizosphere soil in the same treatment are significantly different at  $p<0.05$ .

**Table S2.** Changes of  $\alpha$ -diversity of soil bacterial communities

| Soil | Observed species | Shannon     | Simpson    | ACE      | Chao      |
|------|------------------|-------------|------------|----------|-----------|
| L    | 3750±126a        | 9.97±0.15a  | 0.99±0.00a | 4160.61a | 4110±106a |
| M    | 3890±142a        | 10.05±0.04a | 0.99±0.00a | 4520.40a | 4479±447a |
| H    | 3676±87a         | 9.99±0.06a  | 0.99±0.00a | 4073.12a | 4004±105a |

Data represent average mean from three repetitions. Different letters in the same column are significantly different at  $p<0.05$ .

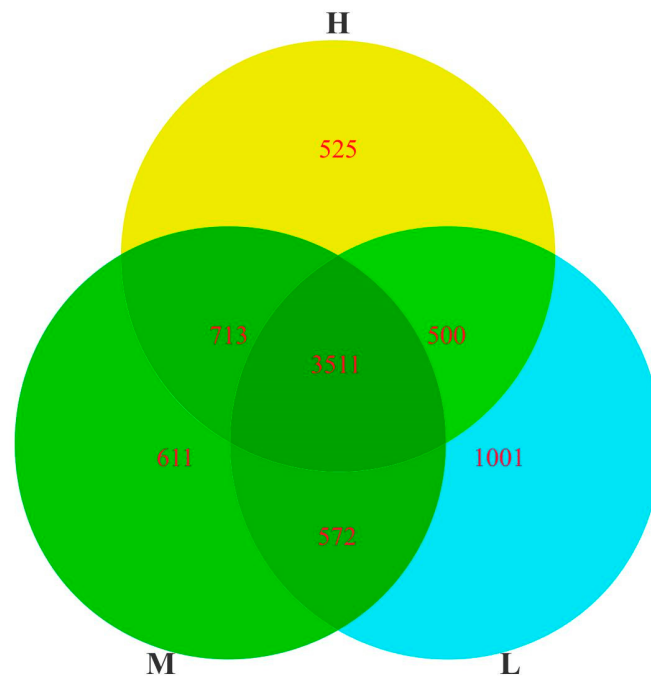

**Figure S1.** Unique OTUs in the three plots

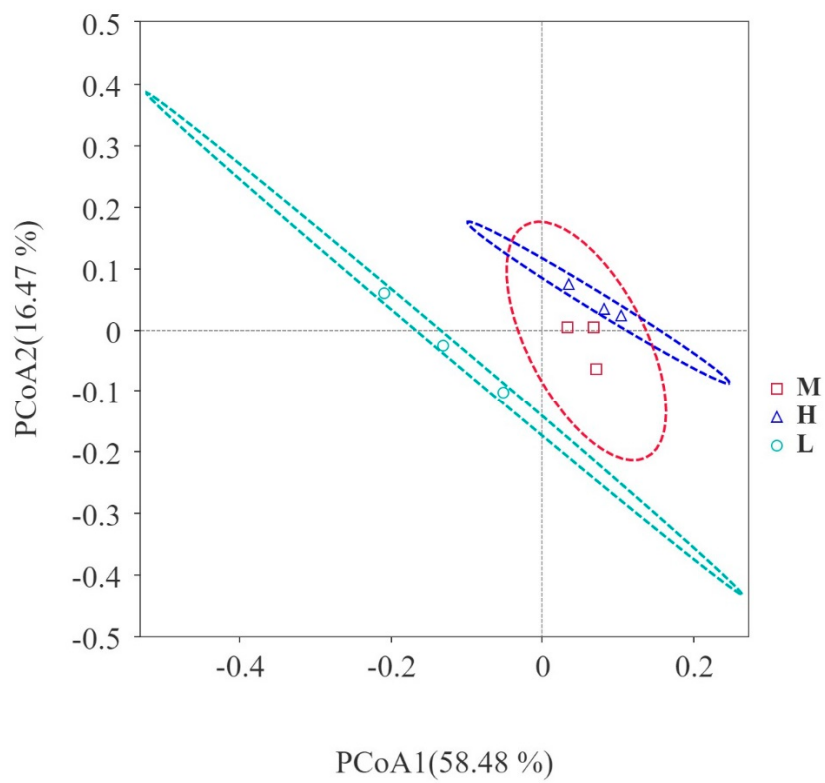

**Figure S2.** PCoA of the soil bacterial community

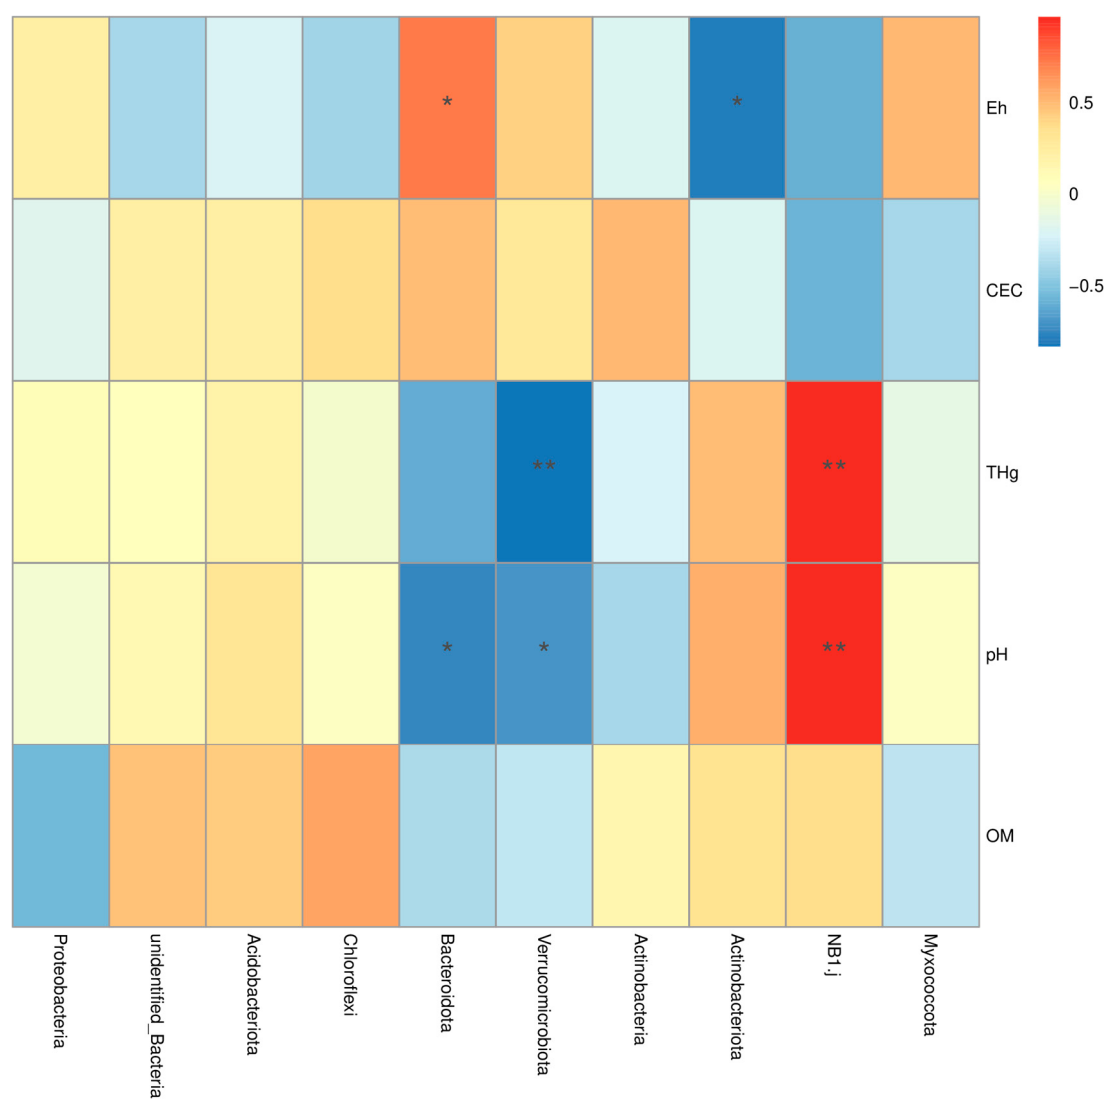

**Figure S3.** Spearman correlation analysis of the soil environmental variables and the 10 most abundant phyla.
